# Supplementary material for: Electromagnetic interference shielding performance of lightweight aramid nanofiber/graphene composite aerogels
Source: Royal Society of Chemistry journal article supplement (doi:10.1039/d3ta07473k), 2024-01-01
Supplement: d3ta07473k1.pdf [file d3ta07473k1.pdf]

Supplementary information

## Electromagnetic Interference Shielding Performance of Lightweight Aramid Nanofiber/Graphene Composite Aerogels

Nian Luo<sup>a</sup>, Yi-yin Zhang<sup>a</sup>, Huan Zhang<sup>a</sup>, Ting-long Liu<sup>a</sup>, Yu Wang<sup>a</sup>, Feng Chen<sup>\*a</sup> and  
Qiang Fu<sup>\*a</sup>

<sup>a</sup> College of Polymer Science and Engineering, Sichuan University, Chengdu 610065,  
China

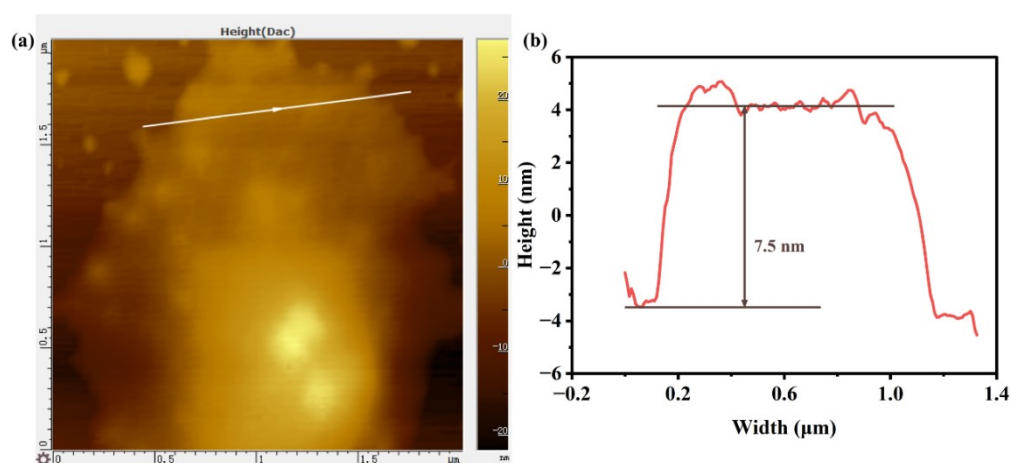

**Fig. S1** (a) AFM image of GN dispersion, (b) height profile of GN.

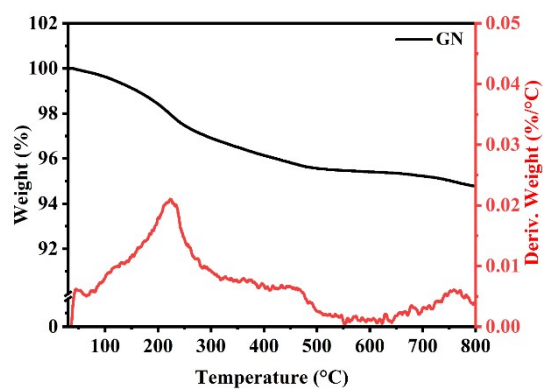

**Fig. S2** TGA and thermogravimetry curve of GN.

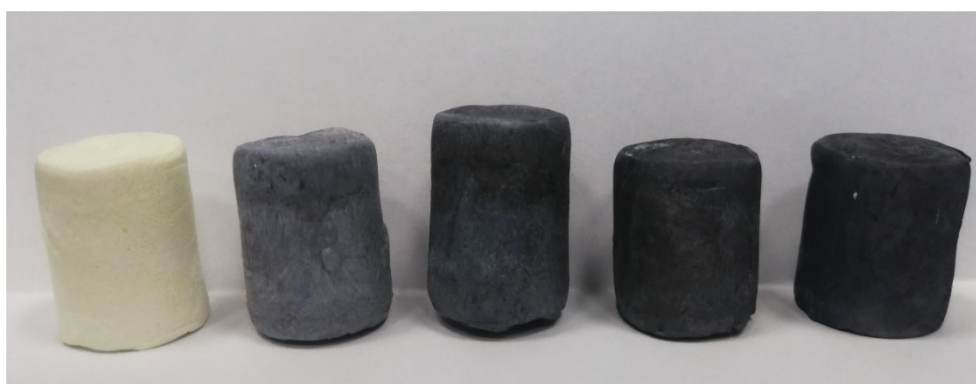

**Fig. S3** Digital photographs of ANF/GN composite aerogels

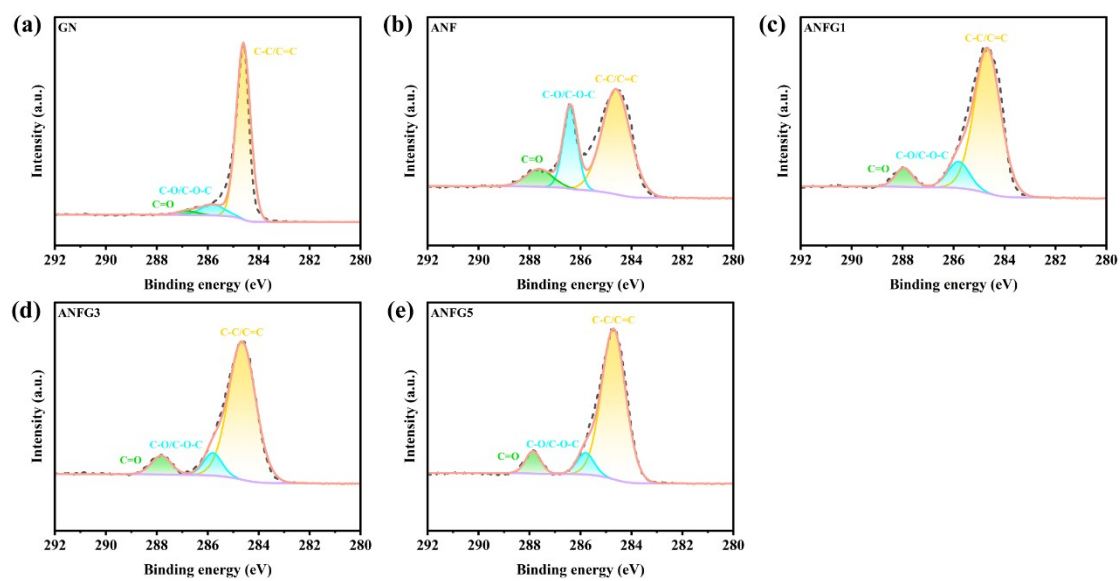

**Fig. S4** Fitted XPS spectra of C1s of (a) GN, (b) ANF aerogel, (c) ANFG1 aerogel, (d) ANFG3 aerogel, and (e) ANFG5 aerogel.

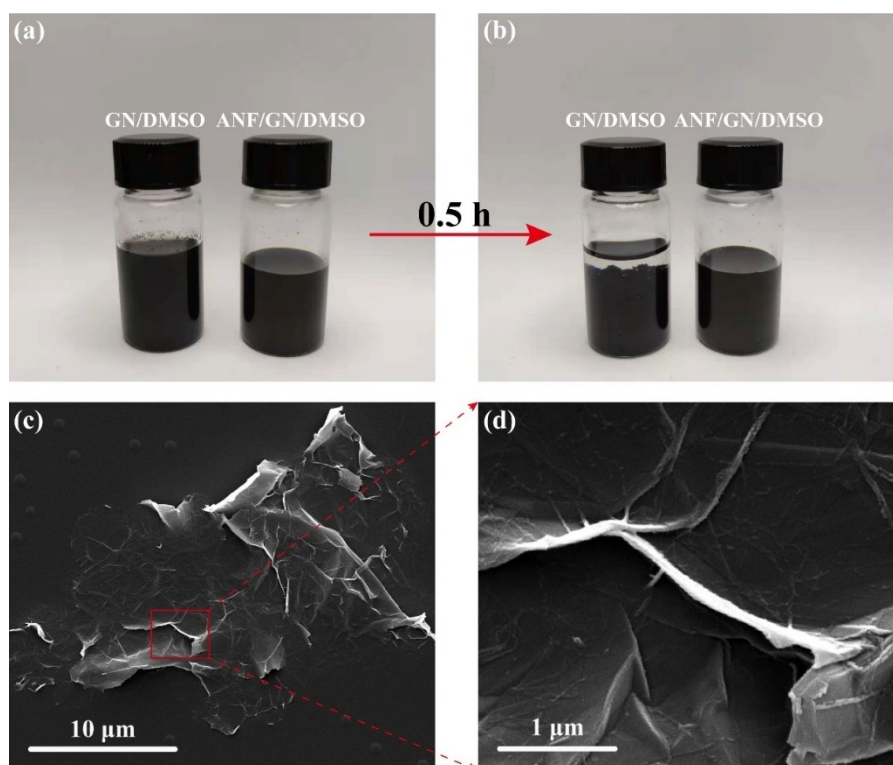

**Fig. S5** (a) optical photograph of the GN/DMSO dispersion and ANF/GN (weight ratio=1:1) dispersion, (b) optical photograph of the GN/DMSO dispersion and ANF/GN (weight ratio=1:1) dispersion standing for 0.5 h, (c-d) SEM images of ANF/GN dispersion (weight ratio=1:1)

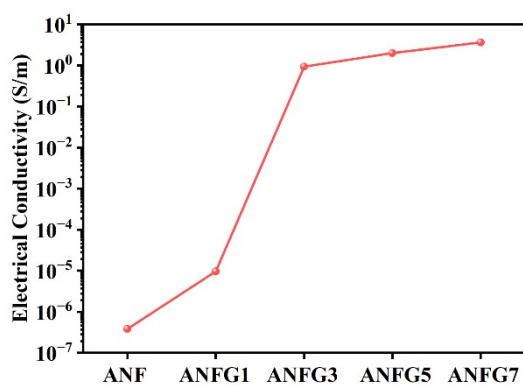

**Fig. S6** Electrical conductivity of ANF/GN composite aerogels

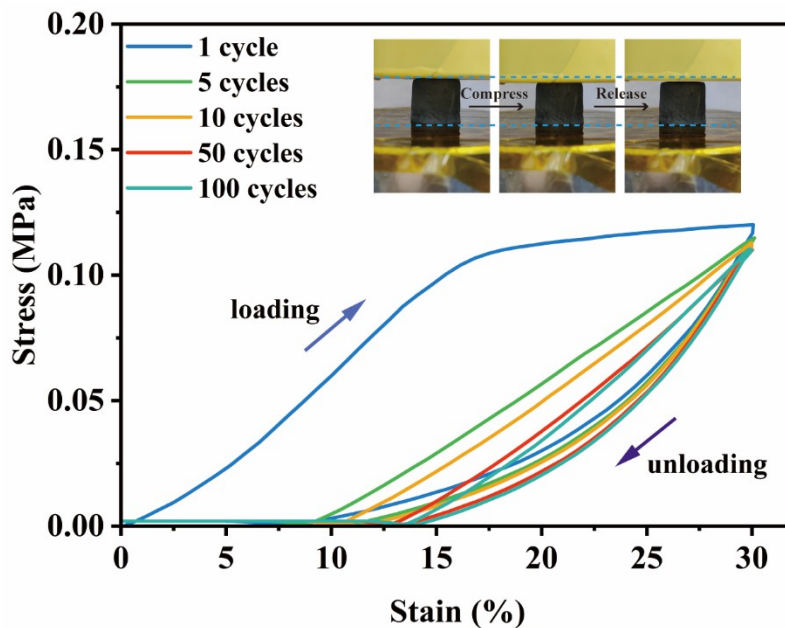

Fig. S7 Compressive curves of ANFG7 composite aerogel for 100 compression cycles.

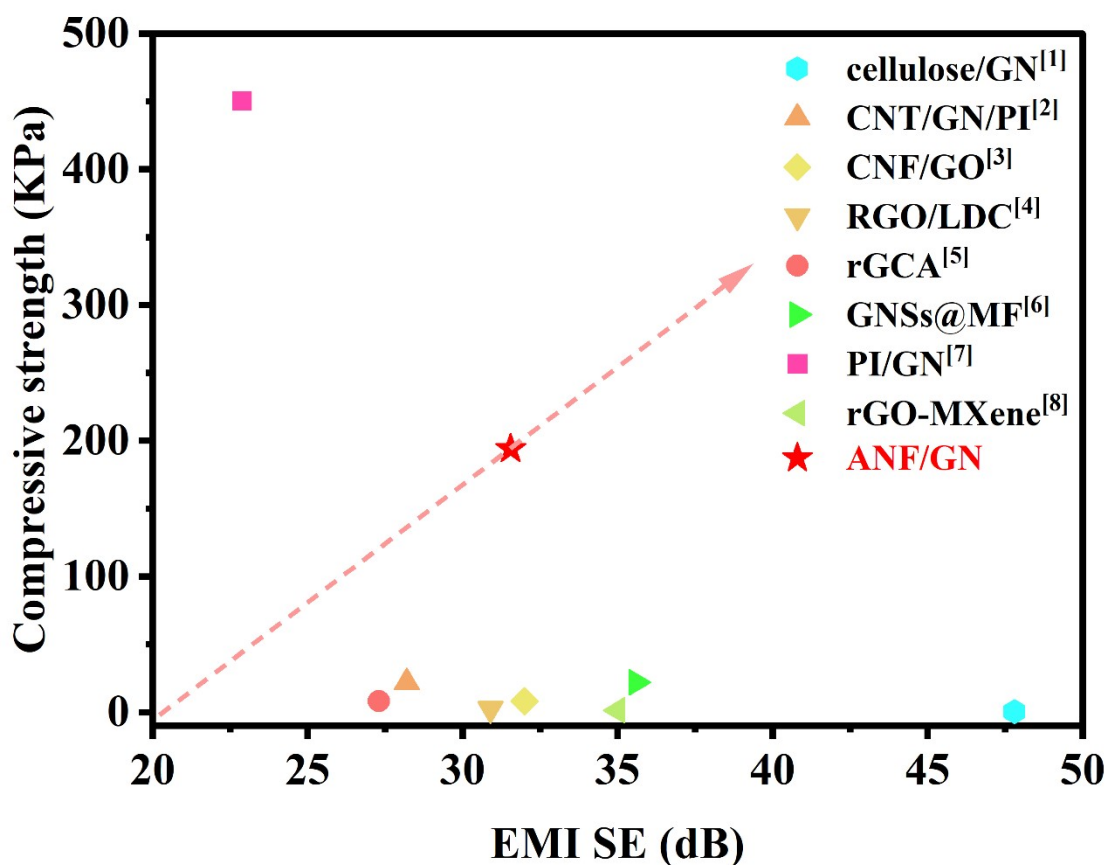

Fig. S8 Comparison of compressive strength of graphene composites versus EMI SE.<sup>1-8</sup>

Table S1 Contrast of EMI shielding performance of the polymer/Graphene Composites

| Sample | Graphene content | Thickness (mm) | Density (g/cm <sup>3</sup> ) | EMI SE (dB) | SSE/t (dB·cm <sup>2</sup> /g) | Ref.      |
|--------|------------------|----------------|------------------------------|-------------|-------------------------------|-----------|
| PMMA   | 1.8 vol%         | 2.4            | 0.79                         | 19          | 100.21                        | 9         |
| PMMA   | 4.23 vol%        | 3.4            | 0.22                         | 30          | 401.07                        | 10        |
| PI     | 16.0 wt%         | 0.8            | 0.28                         | 16.5-20.8   | 737-929                       | 11        |
| PI     | 8.0 wt%          | 0.5            | 0.43                         | 13.7-14.9   | 637-693                       | 12        |
| PI     | 13.0 wt%         | 2.5            | 0.076                        | 28.8        | 1515.79                       | 13        |
| PEI    | 10 wt%           | 2.3            | 0.3                          | 20          | 289.86                        | 14        |
| PS     | 30 wt%           | 2.5            | 0.45                         | 29.3        | 260.44                        | 15        |
| PU     | 6.5 wt%          | 1.8            | 1.08                         | 21.8        | 112.14                        | 16        |
| PU     | 2.01 vol%        | 2.0            | 0.21                         | 35.6        | 847.62                        | 6         |
| PU     | 1 wt%            | 2.5            | 0.092                        | 20          | 869.57                        | 17        |
| epoxy  | 0.33 wt%         | 4.0            | 0.004                        | 35          | 21875                         | 18        |
| ANF    | 41.2 wt%         | 2.0            | 0.041                        | 29.8-31.6   | 3612.9-3880.8                 | This work |

## Reference

1. Y.-J. Wan, P.-L. Zhu, S.-H. Yu, R. Sun, C.-P. Wong and W.-H. Liao, *Carbon*, 2017, **115**, 629-639.
2. Y.-Y. Wang, W.-J. Sun, D.-X. Yan, K. Dai and Z.-M. Li, *Carbon*, 2021, **176**, 118-125.
3. M. Li, M. Zhang, Y. Zhao, S. Jiang, Q. Xu, F. Han, J. Zhu, L. Liu and A. Ge, *Carbohydrate Polymers*, 2022, **286**.

4. Z. Zeng, C. Wang, Y. Zhang, P. Wang, S. I. Seyed Shahabadi, Y. Pei, M. Chen and X. Lu, *ACS Applied Materials & Interfaces*, 2018, **10**, 8205-8213.
5. C. Li, J. Guo, P. Xu, W. Hu, J. Lv, B. Shi, Z. Zhang and R. Li, *Separation and Purification Technology*, 2023, **307**.
6. B. Fu, P. Ren, Z. Guo, Y. Du, Y. Jin, Z. Sun, Z. Dai and F. Ren, *Composites Part B: Engineering*, 2021, **215**.
7. Z. Yu, T. Dai, S. Yuan, H. Zou and P. Liu, *ACS Applied Materials & Interfaces*, 2020, **12**, 30990-31001.
8. Q. Chen, K. Zhang, L. Huang, Y. Li and Y. Yuan, *Advanced Engineering Materials*, 2022, **24**.
9. H. B. Zhang, Q. Yan, W. G. Zheng, Z. He and Z. Z. Yu, *ACS Appl Mater Interfaces*, 2011, **3**, 918-924.
10. H.-B. Zhang, W.-G. Zheng, Q. Yan, Z.-G. Jiang and Z.-Z. Yu, *Carbon*, 2012, **50**, 5117-5125.
11. Y. Li, X. Pei, B. Shen, W. Zhai, L. Zhang and W. Zheng, *RSC Advances*, 2015, **5**, 24342-24351.
12. H. Yang, Z. Li, H. Zou and P. Liu, *Polymers for Advanced Technologies*, 2017, **28**, 233-242.
13. Z. Yu, T. Dai, S. Yuan, H. Zou and P. Liu, *ACS Appl Mater Interfaces*, 2020, **12**, 30990-31001.
14. J. Ling, W. Zhai, W. Feng, B. Shen, J. Zhang and W. Zheng, *ACS Appl Mater Interfaces*, 2013, **5**, 2677-2684.

15. D.-X. Yan, P.-G. Ren, H. Pang, Q. Fu, M.-B. Yang and Z.-M. Li, *Journal of Materials Chemistry*, 2012, **22**.
16. Q. Jiang, X. Liao, J. Li, J. Chen, G. Wang, J. Yi, Q. Yang and G. Li, *Composites Part A: Applied Science and Manufacturing*, 2019, **123**, 310-319.
17. J. N. Gavgani, H. Adelnia, D. Zaarei and M. Moazzami Gudarzi, *RSC Advances*, 2016, **6**, 27517-27527.
18. Y. Chen, H.-B. Zhang, M. Wang, X. Qian, A. Dasari and Z.-Z. Yu, *Composites Science and Technology*, 2017, **152**, 254-262.
